# Supplementary material for: Synthesis, characterization and p–n type gas sensing behaviour of CuFeO2 delafossite type inorganic wires using Fe and Cu complexes as single source molecular precursors
Source: Royal Society of Chemistry journal article supplement (doi:10.1039/c3ra47514j), 2014-01-01
Supplement: c3ra47514j1.pdf [file c3ra47514j1.pdf]

## Supporting Information

### Synthesis and characterization of $\text{CuFeO}_2$ delafossite type inorganic wires using Fe and Cu single source molecular precursors

Julia Patzsch, Ildiko Balog, Christian W. Lehmann and Jörg J. Schneider

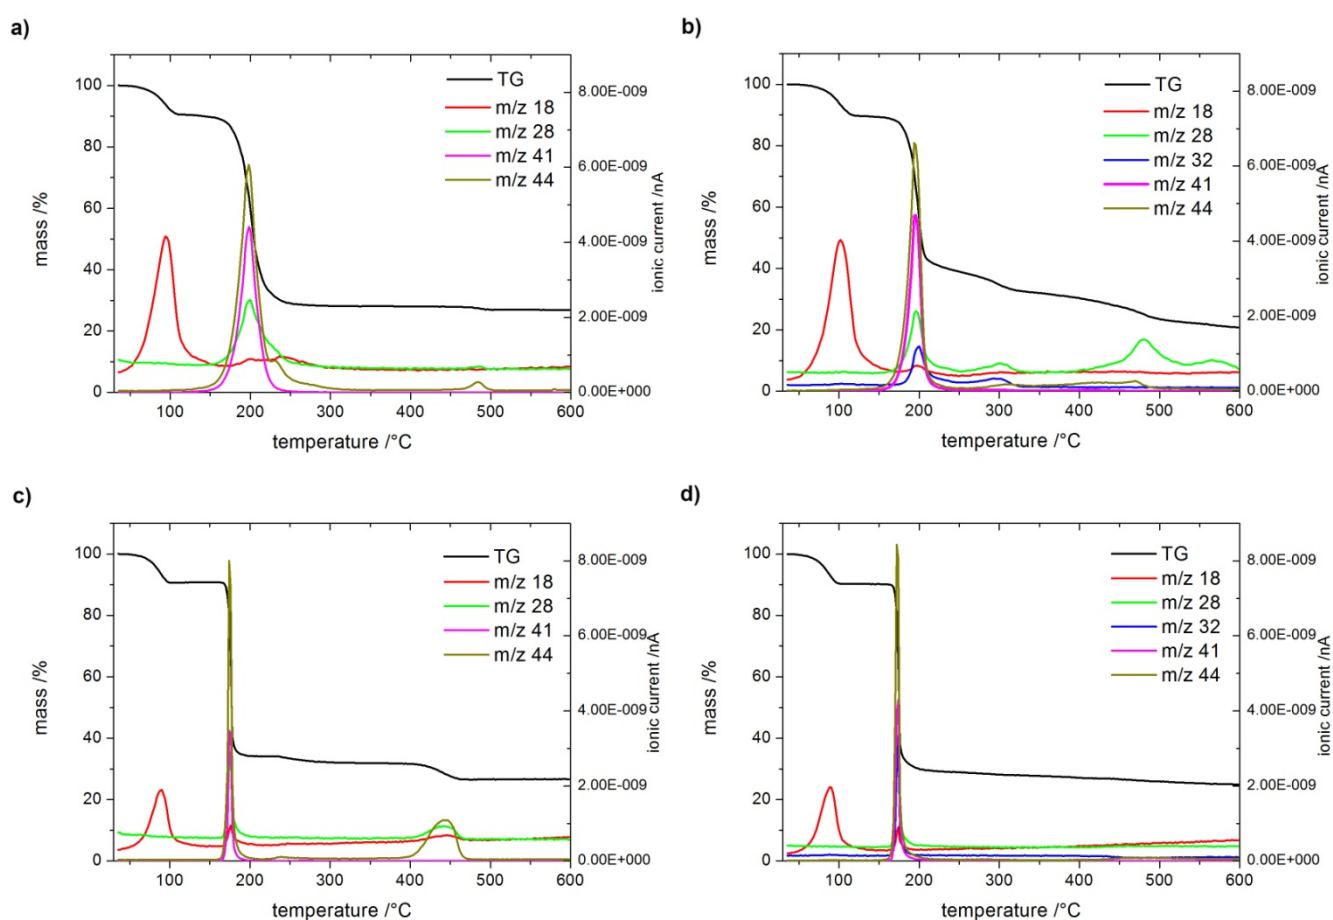

Figure S1. TG-coupled MS of di[2-(methoxyimino)propanoato]iron **1** in (a) oxygen and (b) helium and di[2-(methoxyimino)propanoato]copper **2** in (c) oxygen and (d) helium.

**Table S1. Crystal data and structure refinement.**

| Compound                                     | 1                                                               | 2                                                               |
|----------------------------------------------|-----------------------------------------------------------------|-----------------------------------------------------------------|
| Empirical formula                            | C <sub>8</sub> H <sub>16</sub> Fe N <sub>2</sub> O <sub>8</sub> | C <sub>8</sub> H <sub>16</sub> Cu N <sub>2</sub> O <sub>8</sub> |
| Color                                        | Yellow                                                          | light blue                                                      |
| Formula weight                               | 324.08 g mol <sup>-1</sup>                                      | 331.77 g mol <sup>-1</sup>                                      |
| Temperature                                  | 100 K                                                           | 299 K                                                           |
| Wavelength                                   | 0.71073 Å                                                       | 0.71073 Å                                                       |
| Crystal system                               | Monoclinic                                                      | Triclinic                                                       |
| Space group                                  | P 2 <sub>1</sub> /c, (no. 14)                                   | P $\bar{1}$ (no. 2)                                             |
| Unit cell dimensions                         |                                                                 |                                                                 |
| a                                            | 10.0654(12) Å                                                   | 6.109(1) Å                                                      |
| b                                            | 8.9084(10) Å                                                    | 7.008(1) Å                                                      |
| c                                            | 7.2243(9) Å                                                     | 9.152(2) Å                                                      |
| $\alpha$                                     |                                                                 | 102.02(2)°                                                      |
| $\beta$                                      | 98.313(2)°                                                      | 95.06(1)°                                                       |
| $\gamma$                                     |                                                                 | 112.48(2)°                                                      |
| Volume                                       | 640.97(13) Å <sup>3</sup>                                       | 347.94(11) Å <sup>3</sup>                                       |
| Z                                            | 2                                                               | 1                                                               |
| Density (calculated)                         | 1.679 Mg m <sup>-3</sup>                                        | 1.583 Mg m <sup>-3</sup>                                        |
| Absorption coefficient                       | 1.214 mm <sup>-1</sup>                                          | 1.604 mm <sup>-1</sup>                                          |
| F(000)                                       | 336 e                                                           | 171 e                                                           |
| Crystal size                                 | 0.30 x 0.23 x 0.05 mm <sup>3</sup>                              | 0.30 x 0.20 x 0.06 mm <sup>3</sup>                              |
| $\theta$ range for data collection           | 3.07 to 33.46°                                                  | 3.26 to 26.36°                                                  |
| Index ranges                                 | -15 ≤ h ≤ 15, -13 ≤ k ≤ 13, -11 ≤ l ≤ 11                        | -7 ≤ h ≤ 7, -7 ≤ k ≤ 8, -9 ≤ l ≤ 11                             |
| Reflections collected                        | 20811                                                           | 2162                                                            |
| Independent reflections                      | 2508 [R <sub>int</sub> = 0.013]                                 | 1422 [R <sub>int</sub> = 0.012]                                 |
| Reflections with I > 2σ(I)                   | 2400                                                            | 1371                                                            |
| Completeness to $\theta = 27.50^\circ$       | 99.9 %                                                          | 99.7 %                                                          |
| Absorption correction                        | Gaussian                                                        | Multi-scan                                                      |
| Max. and min. transmission                   | 0.94204, 0.71359                                                | 0.9099, 0.6447                                                  |
| Refinement method                            | Full-matrix least-squares on F <sup>2</sup>                     |                                                                 |
| Data / restraints / parameters               | 2508 / 1 / 96                                                   | 1422 / 2 / 94                                                   |
| Goodness-of-fit on F <sup>2</sup>            | 1.093                                                           | 1.078                                                           |
| Final R indices                              |                                                                 |                                                                 |
| [I > 2σ(I)] R <sub>1</sub> , wR <sup>2</sup> | 0.019, 0.053                                                    | 0.03, 0.08                                                      |
| (all data) R <sub>1</sub> , wR <sup>2</sup>  | 0.02, 0.053                                                     | 0.032, 0.082                                                    |
| Largest diff. peak and hole                  | 0.5, -0.5 e Å <sup>-3</sup>                                     | 0.4, -0.3 e Å <sup>-3</sup>                                     |
